# Supplementary material for: Photocrosslinkable starch cinnamyl ethers as bioinspired bio-based polymers
Source: Royal Society of Chemistry journal article supplement (doi:10.1039/d4tb01406e), 2024-11-27
Supplement: d4tb01406e1.pdf [file d4tb01406e1.pdf]

Supplementary Information

# Synthesis of Photo-Cross-Linkable Starch by Etherification with Cinnamyl Units

Simona Petroni<sup>1§</sup>, Sara Fernanda Orsini<sup>2§</sup>, Daniele Bugnotti<sup>3</sup>, Emanuela Callone<sup>3</sup>, Sandra Dirè<sup>3,4</sup>, Luca Zoia<sup>5</sup>, Roberta Bongiovanni<sup>6,7</sup>, Sara Dalle Vacche<sup>6,7</sup>, Alessandra Vitale<sup>6,7</sup>, Luisa Raimondo<sup>2</sup>, Adele Sassella<sup>2</sup>, Pietro Mariani<sup>2</sup>, Massimiliano D'Arienzo<sup>1\*</sup>, Laura Cipolla<sup>2\*</sup>

*§: these authors contributed equally to the work*

<sup>1</sup> Department of Biotechnology and Biosciences, University of Milano-Bicocca, P.za della Scienza 2, 20126 Milano, Italy

<sup>2</sup> Department of Materials Science, University of Milano-Bicocca, Via R. Cozzi 55, 20125 Milano, Italy

<sup>3</sup> “Klaus Müller” Magnetic Resonance Lab., Department of Industrial Engineering, University of Trento, Via Sommarive 9, 38123 Trento, Italy

<sup>4</sup> Department Industrial Engineering, University of Trento, Via Sommarive 9, 38123 Trento, Italy

<sup>5</sup> Department of Earth and Environmental Sciences, University of Milano-Bicocca, Building U01, Piazza della Scienza 1, 20126 Milan, Italy

<sup>6</sup> Department of Applied Science and Technology, DISAT, Politecnico di Torino, Corso Duca degli Abruzzi 24, 10129 Torino, Italy

<sup>7</sup> Consorzio Interuniversitario Nazionale per la Scienza e Tecnologia dei Materiali, (INSTM) Via G. Giusti, 9, 50121 Firenze, Italy

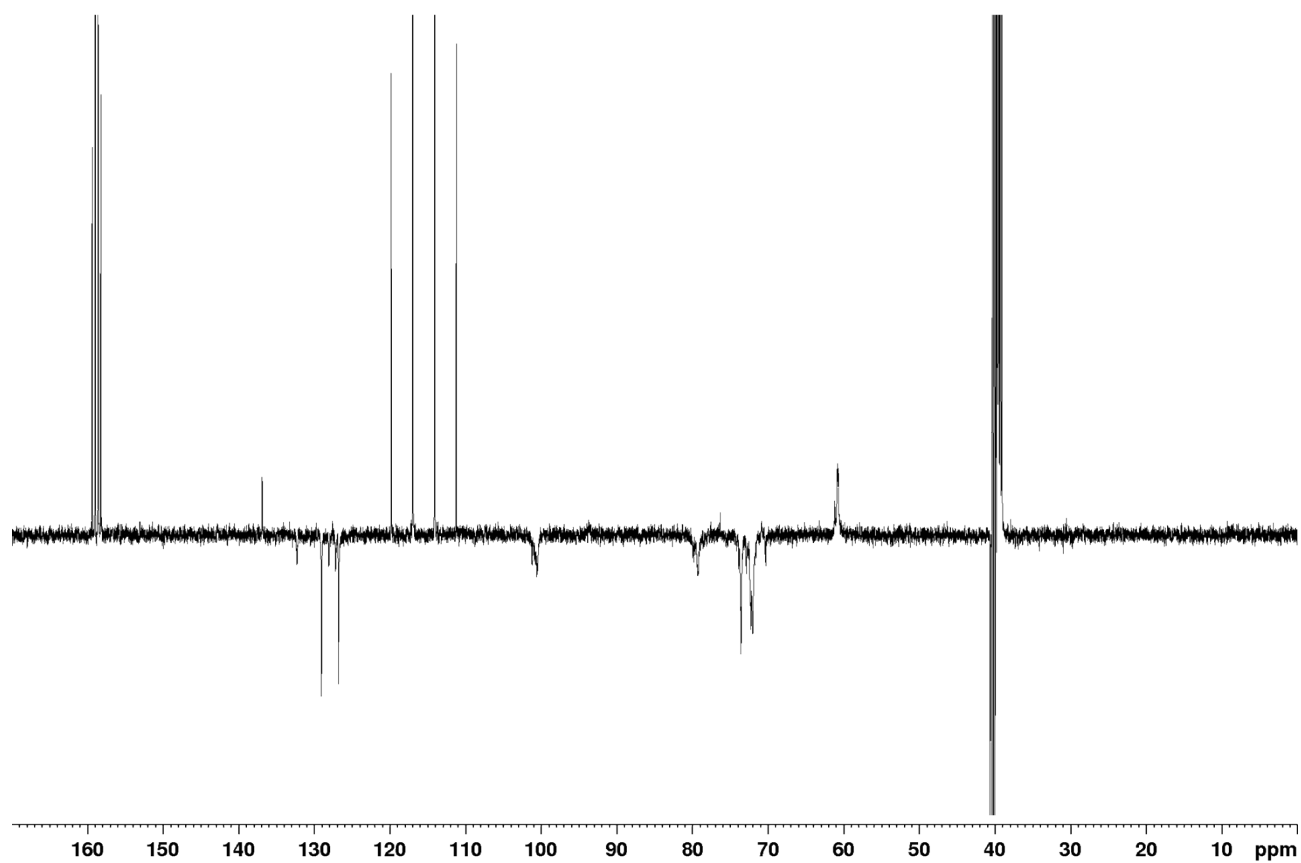

**Figure S1.**  $^{13}\text{C}$ -NMR spectrum of CS1

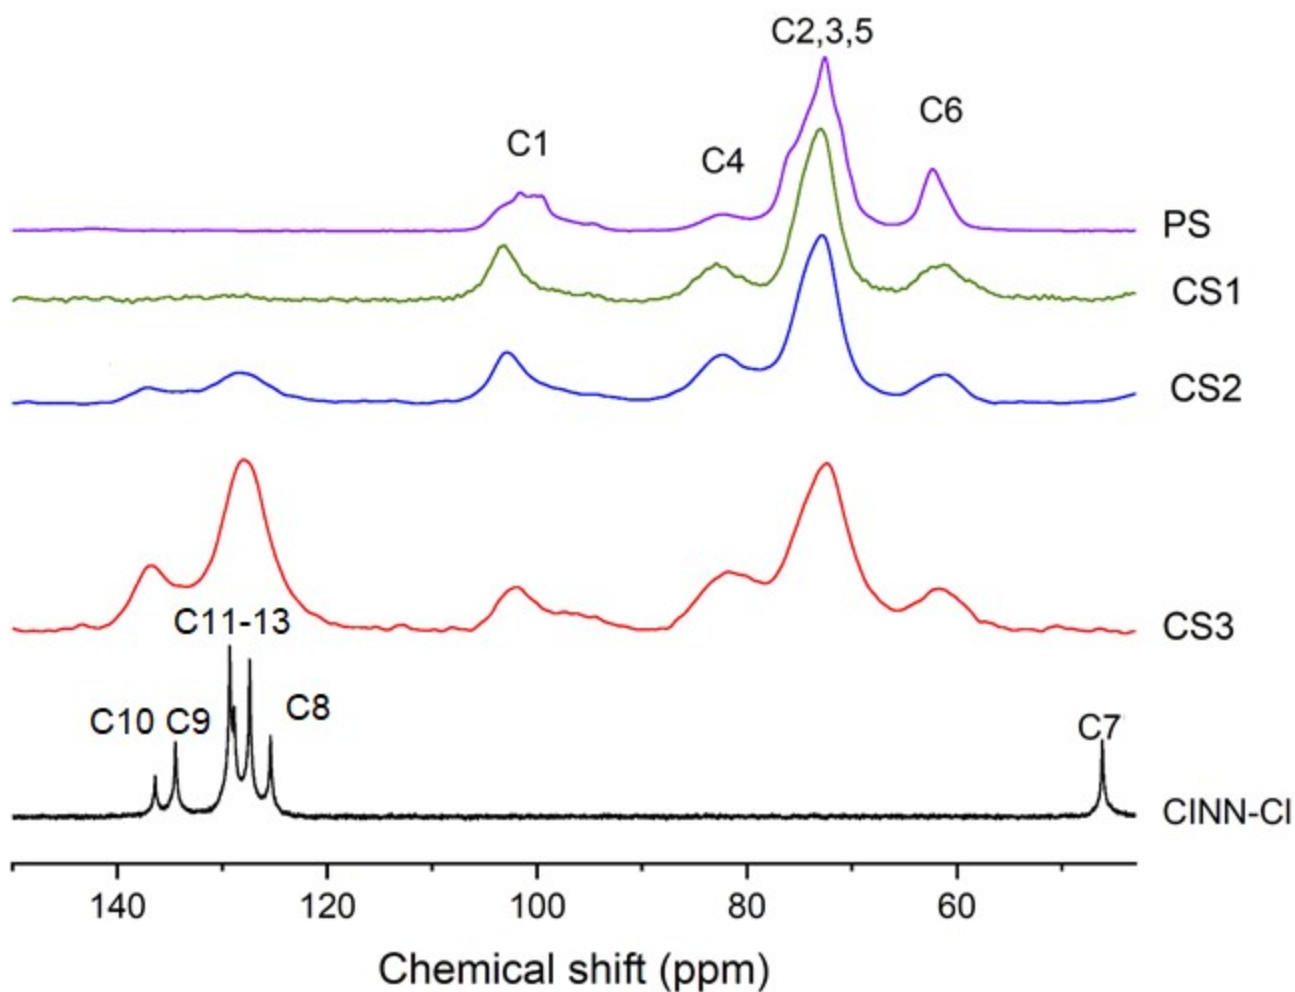

**Figure S2.**  $^{13}\text{C}$  CPMAS NMR spectra of samples CS1-3 and PS and CINN-Cl as references.

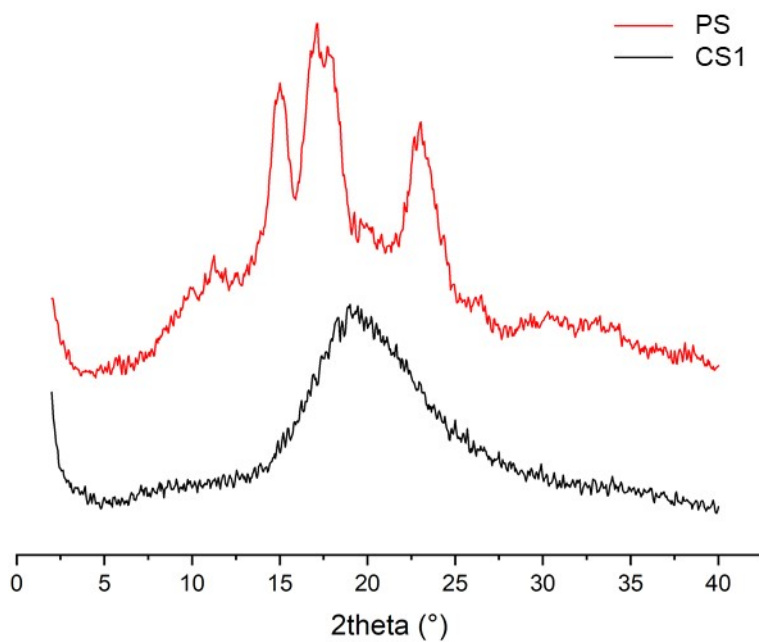

**Figure S3.** XRD patterns of yuca starch (PS) and functionalized starch (CS1), as representative.

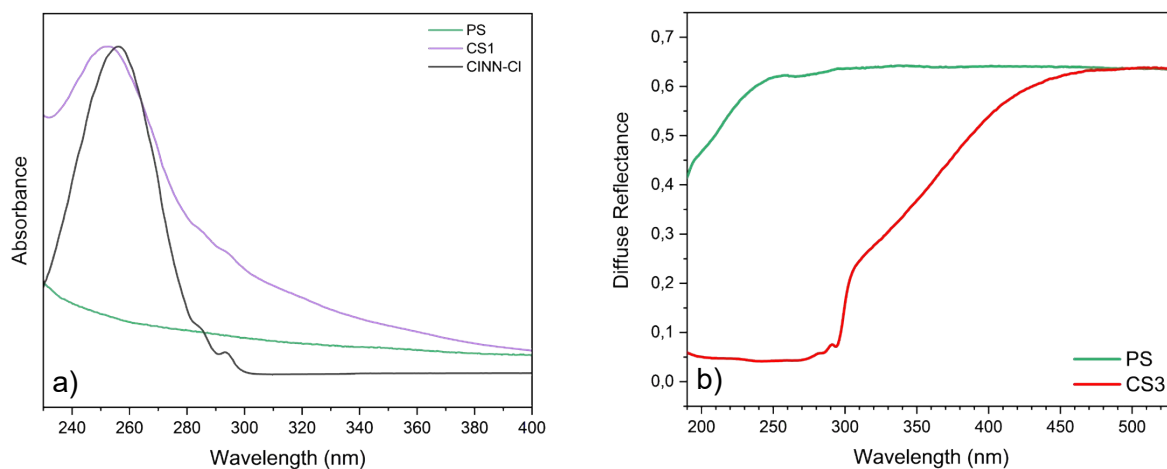

**Figure S4.** a) Solution-phase (water) UV-Vis normalized spectra of native yuca starch (green line), starch cinnamyl ether (sample CS1, violet line) and CINN-Cl precursor (black line); b) UV-DRS spectra of pristine starch material (green curve) and starch cinnamyl ether with the highest DS (sample CS3, red line).

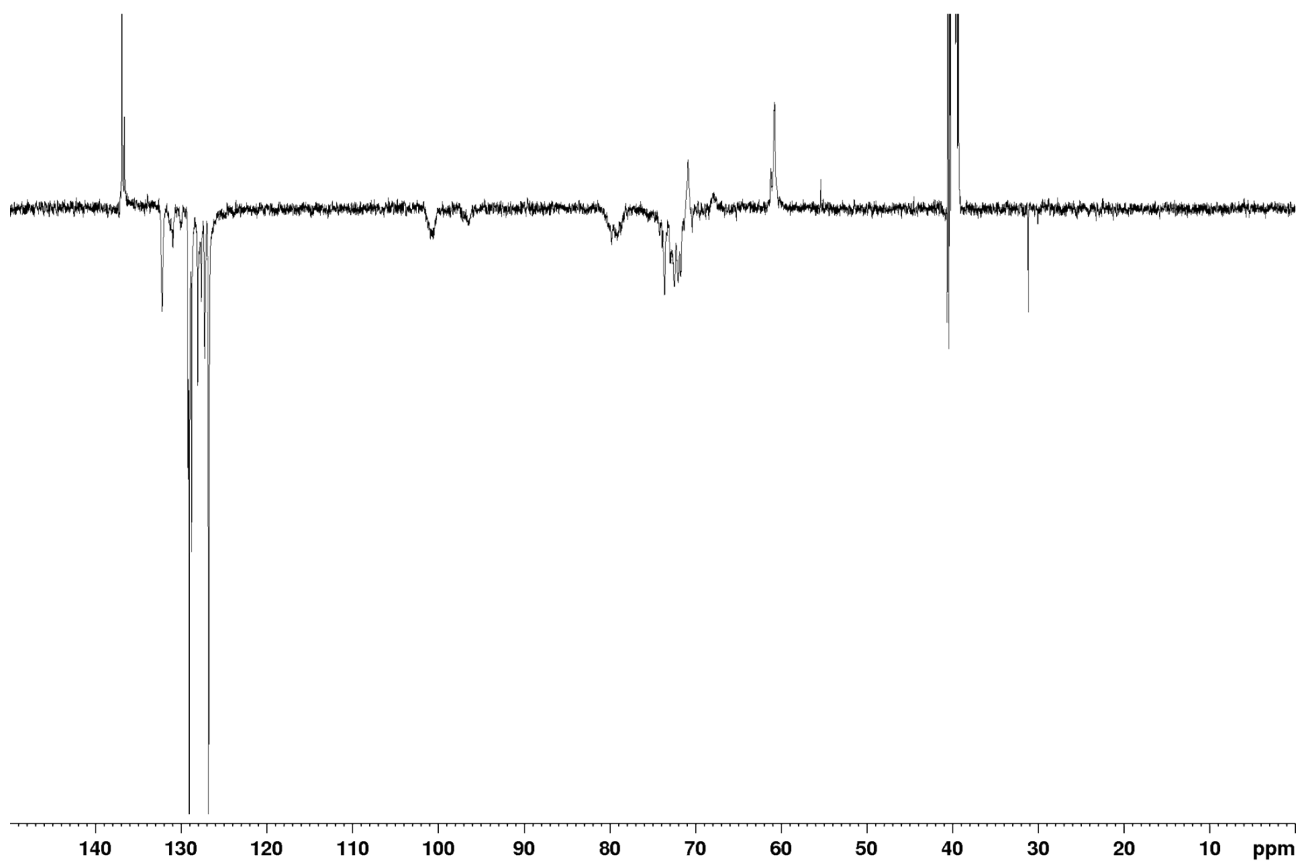

**Figure S5.**  $^{13}\text{C}$ -NMR spectrum of CS2 dissolved in DMSO- $d_6$  after 60 hours at 365 nm

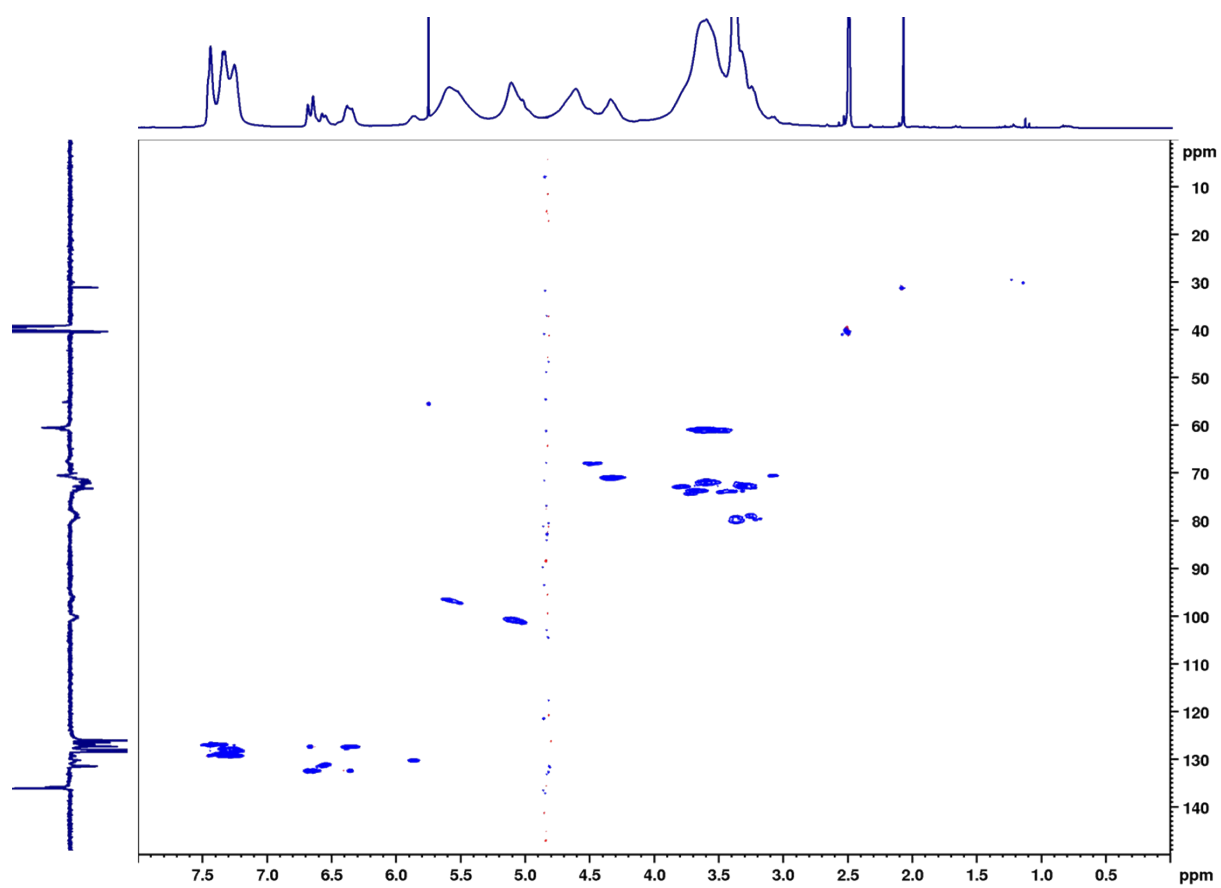

**Figure S6.**  $^1\text{H}$ - $^{13}\text{C}$  HSQC spectrum of CS<sub>2</sub> dissolved in DMSO-d<sub>6</sub> after irradiation at 365 nm
